# Supplementary material for: Controllable fabrication of nickel sulfides with enhanced electrochemical performance
Source: Royal Society of Chemistry journal article supplement (doi:10.1039/c8nj00769a), 2018-01-01
Supplement: c8nj00769a1.pdf [file c8nj00769a1.pdf]

**Supporting Information for**  
**Controllable fabrication of nickel sulfides with enhanced**  
**electrochemical performance**

Jianxia Gou

Department of Chemical Engineering, Binzhou University, 391 Huanghefive Road,

Binzhou, Shandong 256603, China

E-mail: [goujianxia@163.com](mailto:goujianxia@163.com)

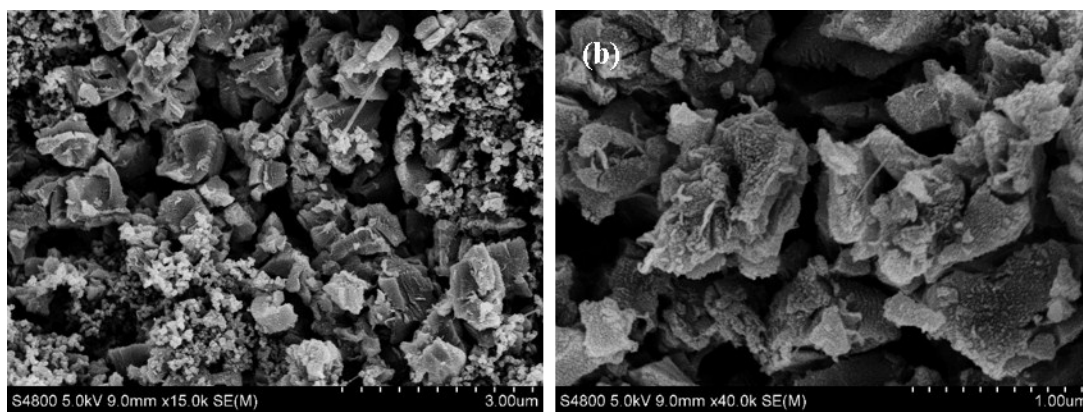

**Figure S1** SEM images of Ni-S-10 h after 4000 cycles

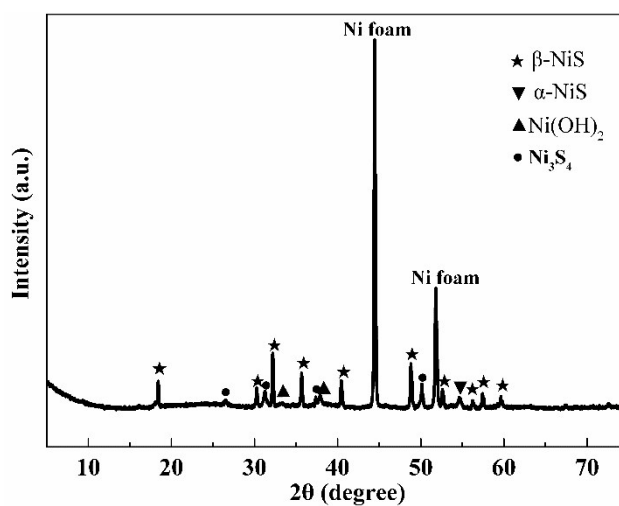

**Figure S2** XRD pattern of Ni-S-10 h after 4000 cycles
